# Supplementary material for: 13C-Metabolic Flux Analysis in Developing Flaxseed Embryos to Understand Storage Lipid Biosynthesis
Source: Preprints.org preprint supplement (doi:10.20944/preprints201912.0257.v1), 2019-12-19
Supplement: Supplementary file 2 [file Supplementary_Table_S1.xlsx]

## Sheet: Supplementary Table S1
13C-metabolic flux analysis in developing flaxseed embryos to understand storage lipid biosynthesis
Sébastien Acket 1 *, Anthony Degournay 1, Yannick Rossez 1, Stéphane Mottelet 2, Pierre Villon 3, Adrian Troncoso-Ponce 1, and Brigitte Thomasset 1
1 Alliance Sorbonne Université, Génie Enzymatique et Cellulaire, UMR CNRS 7025, Université de Technologie de Compiègne, 60205 Compiègne Cedex, France.
2 Alliance Sorbonne Université, EA 4297 TIMR, Transformations Intégrées de la Matière Renouvelable, Université de Technologie de Compiègne, 60205 Compiègne Cedex, France.
3 Alliance Sorbonne Université, Laboratoire Roberval, FRE UTC CNRS 2012, Université de Technologie de Compiègne, 60205 Compiègne Cedex, France.
* Corresponding author. Email address: sebastien.acket@utc.fr
Supplementary Table S1
Supplementary Table S1: The amino acid composition of proteins
The amino acid composition of the extracted proteins was carried out at 0h and 168h of incubation, using LC-HRMS method described in the material and method section. The data is expressed in g.100gDW-1.
Abbreviations: ALA: Alanine; GLY: Glycine; VAL: Valine; LEU: Leucine; ILE: Isoleucine; PRO: Proline; MET: Methionine; SER: Serine; THR: Threonine; PHE: Phenylalanine; ASP: Aspartate; ASN: Asparagine; CYS: Cysteine; GLU: Glutamate; GLN: Glutamine; LYS: Lysine; HIS: Histidine; TYR: Tyrosine; TRP: Tryptophane; ARG: Arginine.
For each kinetic point, four independent experiments were made.
		16 DAF + 0h incubation		16 DAF + 168h incubation
		Average	S.D.	Average	S.D.
	ALA	6.85	0.411516	6.78479	0.650538
	GLY	11.32	0.221687	11.3585	0.0295659
	VAL	5.86	0.445731	5.62251	0.132349
	LEU	6.26	0.0927203	6.06506	0.482386
	ILE	4.37	0.772409	4.90121	0.458917
	PRO	4.87	0.13552	4.69853	0.287849
	MET	1.29	0.489385	0.623871	0.801173
	SER	6.36	0.181438	6.2352	0.833061
	THR	4.27	0.17792	4.32163	0.0980043
	PHE	3.97	0.631717	3.84247	0.345241
	ASP	9.33	0.249355	9.24785	0.0354937
	ASN	0.01	0.01	0.01	0.01
	CYS	0.89	0.0101533	0.913108	0.358582
	GLN	0.01	0.01	0.01	0.01
	GLU	17.87	0.521385	18.5817	0.942271
	LYS	3.77	0.190673	3.94283	0.687658
	HIS	1.89	0.275545	1.34966	0.0981241
	TYR	1.89	0.137647	1.69622	0.302202
	TRP	0.6	0.19	0.801778	0.763532
	ARG	8.34	0.744589	9.01311	0.283282
