# Supplementary material for: 13C-Metabolic Flux Analysis in Developing Flaxseed Embryos to Understand Storage Lipid Biosynthesis
Source: Preprints.org preprint supplement (doi:10.20944/preprints201912.0257.v1), 2019-12-19
Supplement: Supplementary file 3 [file Supplementary_Table_S2.xlsx]

## Sheet: Supplementary Table S2
13C-metabolic flux analysis in developing flaxseed embryos to understand storage lipid biosynthesis
Sébastien Acket 1 *, Anthony Degournay 1, Yannick Rossez 1, Stéphane Mottelet 2, Pierre Villon 3, Adrian Troncoso-Ponce 1, and Brigitte Thomasset 1
1 Alliance Sorbonne Université, Génie Enzymatique et Cellulaire, UMR CNRS 7025, Université de Technologie de Compiègne, 60205 Compiègne Cedex, France.
2 Alliance Sorbonne Université, EA 4297 TIMR, Transformations Intégrées de la Matière Renouvelable, Université de Technologie de Compiègne, 60205 Compiègne Cedex, France.
3 Alliance Sorbonne Université, Laboratoire Roberval, FRE UTC CNRS 2012, Université de Technologie de Compiègne, 60205 Compiègne Cedex, France.
* Corresponding author. Email address: sebastien.acket@utc.fr
Supplementary Table S2
Supplementary Table S2: Evolution of the isotopic enrichment of free organic acids and two carbons from palmitic acid (C16:0) extracted from developing embryos harvested at 16DAF incubated during 24h, 72h, 120h, 168h in the culture medium B, containing 80mM unlabeled glucose, 20 mM [U-13C]glucose, 640mg/l unlabeled glutamine, 160mg/l [U-13C] glutamine.
Mass distributions were corrected for natural isotope abundances using Scilab.
Values are average of three biological replicates.
Abbreviations: AcCoA.p from FA16: Mc Lafferty fragment from palmitic acid that contains 2 carbons from plastidial acetylCoA (AcCoA.p); SUCC: Succinate; MAL: Malate; FUM: Fumarate; CIT/ICIT: mixture of citrate and isocitrate
Isotopic enrichments of organic acids were determined using LC-HRMS as described in material and method section.
Isotopic enrichment of Mc lafferty fragments were determined using GC-MS as described in material and method section.
For each kinetic point, four independent experiments were made.
Metabolites	Carbon	mass isotopomers	16 DAF + 0h incubation		16 DAF + 24h incubation		16 DAF + 72h incubation		16 DAF + 120h incubation		16 DAF + 168h incubation
			Average	S.D.	Average	S.D.	Average	S.D.	Average	S.D.	Average	S.D.
AcCoA.p from FA16	1,2	m 0	1	0	0.840436	0.0563533	0.711888	0.044759	0.567845	0.0240234	0.567114	0.00688792
		m+1	0	0	0.120333	0.0523712	0.171053	0.0316172	0.225665	0.0237946	0.2129	0.0348625
		m+2	0	0	0.039231	0.00398206	0.117058	0.0144597	0.20649	0.000228864	0.219986	0.0279746
SUCC	1,2,3,4	m0	1	0	0.80333	0.047189	0.717045	0.036211	0.695123	0.0069846	0.734403	0.00344401
		m+1	0	0	0.0767746	0.0181877	0.116352	0.0114077	0.142481	0.00461222	0.119827	0.00707506
		m+2	0	0	0.0691327	0.0530035	0.127224	0.0604317	0.0904268	0.0171008	0.112435	0.0026811
		m+3	0	0	0.0174264	0.0026033	0.00326239	0.00293316	0.00587823	0.00831307	0.00590842	0.00835577
		m+4	0	0	0.033336	0.0308523	0.0361161	0.0163632	0.0660902	0.0138171	0.0274271	0.00930572
MAL	1,2,3,4	m0	1	0	0.67831	0.0146977	0.644319	0.0129828	0.642188	0.00304529	0.633372	0.00625583
		m+1	0	0	0.129375	0.00944945	0.151569	0.0040232	0.159991	0.00784518	0.172638	0.00548727
		m+2	0	0	0.0779228	0.0098114	0.0919727	0.0128429	0.102114	0.00292003	0.110003	0.00578914
		m+3	0	0	0.0663696	0.00921672	0.0648367	0.00949584	0.0551896	0.000912607	0.0490151	0.00579593
		m+4	0	0	0.0480221	0.00889464	0.0473027	0.00435228	0.040517	0.000967253	0.0349722	0.000761766
FUM	1,2,3,4	m0	1	0	0.736172	0.0132856	0.671252	0.0273596	0.668342	0.00808103	0.674719	0.00362447
		m+1	0	0	0.170436	0.0195411	0.155986	0.029348	0.13851	0.0324067	0.152181	0.00250523
		m+2	0	0	0.022641	0.0121464	0.0879162	0.0120935	0.100213	0.0295154	0.115393	0.00698798
		m+3	0	0	0.0547083	0.0158663	0.0375414	0.0147111	0.0601764	0.00134844	0.0271241	0.0154845
		m+4	0	0	0.0160428	0.0131762	0.0473043	0.0162889	0.0327587	0.00384125	0.030583	0.00737729
CIT/ICIT	1,2,3,4,5,6	m0	1	0	0.754825	0.0589599	0.574646	0.0307527	0.529892	0.0011892	0.538396	0.00320376
		m+1	0	0	0.101498	0.00910909	0.16254	0.0125258	0.186027	0.00161204	0.182429	0.00435951
		m+2	0	0	0.111049	0.0165361	0.117698	0.00933195	0.142268	0.000338854	0.142503	0.00279371
		m+3	0	0	0.0124927	0.021638	0.061463	0.00431277	0.0618542	0.00319327	0.0652816	0.00610001
		m+4	0	0	0.0100065	0.0173318	0.0349065	0.00511292	0.0353167	0.00162791	0.031619	0.00176473
		m+5	0	0	0.0101297	0.0175452	0.0382992	0.00567926	0.0349647	0.00484656	0.0310577	0.00196224
		m+6	0	0	0	0	0.0104477	0.00184581	0.00967743	0.000141112	0.00871453	0.000530001
