# Supplementary material for: 13C-Metabolic Flux Analysis in Developing Flaxseed Embryos to Understand Storage Lipid Biosynthesis
Source: Preprints.org preprint supplement (doi:10.20944/preprints201912.0257.v1), 2019-12-19
Supplement: Supplementary file 4 [file Supplementary_Table_S3.xlsx]

## Sheet: Supplementary Data S3
13C-metabolic flux analysis in developing flaxseed embryos to understand storage lipid biosynthesis
Sébastien Acket 1 *, Anthony Degournay 1, Yannick Rossez 1, Stéphane Mottelet 2, Pierre Villon 3, Adrian Troncoso-Ponce 1, and Brigitte Thomasset 1
1 Alliance Sorbonne Université, Génie Enzymatique et Cellulaire, UMR CNRS 7025, Université de Technologie de Compiègne, 60205 Compiègne Cedex, France.
2 Alliance Sorbonne Université, EA 4297 TIMR, Transformations Intégrées de la Matière Renouvelable, Université de Technologie de Compiègne, 60205 Compiègne Cedex, France.
3 Alliance Sorbonne Université, Laboratoire Roberval, FRE UTC CNRS 2012, Université de Technologie de Compiègne, 60205 Compiègne Cedex, France.
* Corresponding author. Email address: sebastien.acket@utc.fr
Supplementary Table S3
Supplementary Table S3: Lists of reactions used with carbon transition of the metabolic network of flaxseed embryos cell.
Abbreviations of metabolites are detailed in the Supplementary Table S4.
Number	Abbreviation	Reactions	Enzymes/Reactions
r1	Vg	GlCext (abcdef) -> GLC (abcdef)	Rate of glucose uptake
r2	Va	GLNext (abcde) -> GLN (abcde)	Rate of glutamine uptake
r3	Vsusy	UDPG (abcdefz) + Fruc (ABCDEF) <-> Suc (ABCDEFabcdef) + UDP (z)	Sucrose synthase
r4	Vinv	Suc (ABCDEFabcdef) -> GLC (abcdef) + Fruc (ABCDEF)	Invertase
r5	Vhxk2	Fruc (abcdef) + ATP (z) -> F6P.c (abcdef) + ADP (z)	Hexokinase 2
r6	Vsps	UDPG (abcdefz) + F6P.c (ABCDEF) -> SucP (abcdefABCDEF) + UDP (z)	Sucrose phosphate synthase
r7	Vspp	SucP (ABCDEFabcdef) -> Suc (ABCDEFabcdef)	Sucrose phosphate phosphatase
r8	Vhxk1	GLC (abcdef) + ATP (z) <-> G6P.c (abcdef) + ADP (z)	Hexokinase 1
r9	Vgpi	G6P.c (abcdef) <-> F6P.c (abcdef)	Glucose-6-phosphate isomérase
r10	Vgpt	G6P.c (abcdef) <-> G6P.p (abcdef)	Glucose-6-phopshate transporter
r11	Vpgm	G6P.p (abcdef) <-> G1P (abcdef)	Phosphoglucomutase
r12	Vgpa	G1P (abcdef) + ATP (z) -> ADPG (abcedf) + ADP (z)	Glucose-1-phosphate adenylyltransferase
r13	Vsts	ADPG (abcdef) + ATP (z) -> Starch (abcdef) + ADP (z)	Starch synthase
r14	Vsta	Starch (abcdef) -> Starch_eff (abcdef)	Total starch synthesis
r15	Vamy1	Starch (abcdef) -> Starch_d (abcdef)	Amylase 1 degradation
r16	Vamy2	Starch_d (abcdef) + ATP (z) -> G1P (abcdef) + AMP (z)	Amylase 2
r17	Vudpg	G6P.c (abcdef) + UTP (z) <-> UDPG (abcdefz)	Cytosolic Phosphoglucomutase and Glucose-1-phosphate uridylyltransferase
r18	Vpfkc	F6P.c (abcdef) + ATP (z) <-> FBP.c (abcdef) + ADP (z)	Cytosolic Phopshofructokinase
r19	Vald	FBP.c (abcdef) <-> TP (cba) + TP (def)	Aldolase
r20	Vgapdh	TP (abc) + NAD (z) + ADP (y) <-> PEP (abc) + NADH (z) + ATP (y)	Glyceraldehyde-3-phosphate dehydrogenase / Enolase
r21	Vgpdh	TP (abc) + NADH (z) + ATP (y) <-> G3P (abc) + NAD (z) + ADP (y)	Glycerol-3-phosphate dehydrogenase
r22	Vpkc	PEP (abc) + ADP (z) -> PYR.c (abc) + ATP (z)	Cytosolic Pyruvate kinase
r23	Vpepc	PEP (abc) + CO2 (A) -> OAA (abcA)	Phosphoenolpyruvate carboxylase
r24	Vglns	GLU (abcde) + ATP (z) -> GLN (abcde) + ADP (z)	Glutamine synthetase
r25	Vglus	GLN (abcde) + AKG (ABCDE) + NADPH (z) -> GLU (ABCDE) + GLU (abcde) + NADP (z)	Glutamate synthase
r26	Vgludh	AKG (abcde) + NADH (z) <-> GLU (abcde) + NAD (z)	Glutamate dehydrogenase
r27	Valdp	FBP.p (abcdef) -> TP (cba) + TP (def)	Plastidial Aldolase
r28	Vpyrkp	PEP (abc) + ADP (z) <-> PYR.p (abc) + ATP (z)	Plastidial Pyruvate kinase
r29	Vpdhp	PYR.p (abc) +NAD (z) -> CO2 (c) + AcCoA.p (ab) + NADH (z)	Plastidial Pyruvate dehydrogenase
r30	Vacpmt1	AcCoA.p (ab) + CO2 (c) + ATP (z) -> MalonylCoA (abc) + ADP (z)	ACP S-malonyltransférase 1
r31	Vacpat	AcCoA.p (ab) -> AcACP (ab)	ACP S-acétyltransférase
r32	Vacpmt2	MalonylCoA (abc) -> MalonylACP (abc)	ACP S-malonyltransférase 2
r33	Vfa4	AcACP (ab) + MalonylACP (cde) + 2*NADPH (z) -> FA4 (abcd) + 2*NADP (z) + CO2 (e)	3-cetoacyl-ACP synthase, 3-cetoacyl-ACP reductase, 3-hydroxyacyl-ACP dehydratase and énoyl-ACP reductase : C4 Fatty acid synthesis
r34	Vfa6	FA4 (abcd) + MalonylACP (efg) + 2*NADPH (z) -> FA6 (abcdef) + 2*NADP (z) + CO2 (g)	3-cetoacyl-ACP synthase, 3-cetoacyl-ACP reductase, 3-hydroxyacyl-ACP dehydratase and énoyl-ACP reductase : C6 Fatty acid synthesis
r35	Vfa8	FA6 (abcdef) + MalonylACP (ghi) + 2*NADPH (z) -> FA8 (abcdefgh) + 2*NADP (z) + CO2 (i)	3-cetoacyl-ACP synthase, 3-cetoacyl-ACP reductase, 3-hydroxyacyl-ACP dehydratase and énoyl-ACP reductase : C8 Fatty acid synthesis
r36	Vfa10	FA8 (abcdefgh) + MalonylACP (ijk) + 2*NADPH (z) -> FA10 (abcdefghij) + 2*NADP (z) + CO2 (k)	3-cetoacyl-ACP synthase, 3-cetoacyl-ACP reductase, 3-hydroxyacyl-ACP dehydratase and énoyl-ACP reductase : C10 Fatty acid synthesis
r37	Vfa12	FA10 (abcdefghij) + MalonylACP (klm) + 2*NADPH (z) -> FA12 (abcdefghijkl) + 2*NADP (z) + CO2 (m)	3-cetoacyl-ACP synthase, 3-cetoacyl-ACP reductase, 3-hydroxyacyl-ACP dehydratase and énoyl-ACP reductase : C12 Fatty acid synthesis
r38	Vfa14	FA12 (abcdefghijkl) + MalonylACP (mno) + 2*NADPH (z) -> FA14 (abcdefghijklmn) + 2*NADP (z) + CO2 (o)	3-cetoacyl-ACP synthase, 3-cetoacyl-ACP reductase, 3-hydroxyacyl-ACP dehydratase and énoyl-ACP reductase : C14 Fatty acid synthesis
r39	Vfa16	FA14 (abcdefghijklmn) + MalonylACP (opq) + 2*NADPH (z) -> FA16 (abcdefghijklmnop) + 2*NADP (z) + CO2 (q)	3-cetoacyl-ACP synthase, 3-cetoacyl-ACP reductase, 3-hydroxyacyl-ACP dehydratase and énoyl-ACP reductase : C16 Fatty acid synthesis
r40	Vfa16d	FA16 (abcdefghijklmnop) + NADH (z) -> FA161 (abcdefghijklmnop) + NAD (z)	Fatty acid desaturase : desaturation of C16
r41	Vfa18	FA16 (abcdefghijklmnop) + MalonylACP (qrs) + 2*NADPH (z) -> FA18 (abcdefghijklmnopqr) + 2*NADP (z) + CO2 (s)	3-cetoacyl-ACP synthase, 3-cetoacyl-ACP reductase, 3-hydroxyacyl-ACP dehydratase and enoyl-ACP reductase : C18 Fatty acid
r42	Vfa18d	FA18 (abcdefghijklmnopqr) + NADH (z) -> FA18_1 (abcdefghijklmnopqr) + NAD (z)	Fatty acid desaturase : desaturation of C18
r43	Vfa18_1	FA161 (abcdefghijklmnop) + MalonylACP (qrs) + 2*NADPH (z) -> FA18_1 (abcdefghijklmnopqr) + 2*NADP (z) + CO2 (s)	3-cetoacyl-ACP synthase, 3-cetoacyl-ACP reductase, 3-hydroxyacyl-ACP dehydratase and enoyl-ACP réductase : C18_1 Fatty acid synthesis
r44	Vfa16d	FA18_1 (abcdefghijklmnopqr) + NADH (z) -> FA18_2 (abcdefghijklmnopqr) + NAD (z)	Fatty acid desaturase : desaturation of C18_1
r45	Vfa16d	FA18_2 (abcdefghijklmnopqr) + NADH (z) -> FA18_3 (abcdefghijklmnopqr) + NAD (z)	Fatty acid desaturase : desaturation of C18_2
r46	Vtag	G3P + 0.294*FA16 + 0.0945*FA18 + 0.7485*FA18_1 + 0.4113*FA18_2 + 1.45*FA18_3 -> TAG	Glycerol-3-phosphate acyltransferase, lysophosphatidic acid acyltransferase, phosphatidic acid phosphatase and diglyceride acyltransferase
r47	Vppp	G6P.p (abcdef) + 2*NADP (z) -> CO2 (a) + P5Pp (bcdef) + 2*NADPH (z)	Glucose-6-phosphate dehydrogenase, 6-phosphogluconate dehydrogenase, ribose-5-phosphate isomerase and ribulose-phosphate-3-epimerase
r48	Vtk1	P5Pp (ABCDE) + P5Pp (abcde) <-> S7Pp (ABabcde) + TP (CDE)	Transketolase 1
r49	Tald	TP (ABC) + S7Pp (abcdefg) <-> E4Pp (defg) + F6P.p (ABCabc)	Transaldolase
r50	Vtk2	P5Pp (ABCDE) + E4Pp (abcd) <-> TP (CDE) + F6P.p (ABabcd)	Transketolase 1
r51	Vpdhm	PYR.c (abc) + NAD (z) -> CO2 (a) + AcCoA.c (bc) + NADH (z)	Mitochondrial Pyruvate dehydrogenase
r52	Vcs	AcCoA.c (AB) + OAA (abcd) <-> CIT (ABabcd)	Citrate synthase
r53	Vaco	CIT (abcdef) <-> ICIT (abcdef)	Aconitase
r54	Vidh	ICIT (abcdef) + NAD (z) <-> CO2 (c) + AKG (fedba) + NADH (z)	Isocitrate dehydrogenase
r55	Vkdh	AKG (abcde) + NAD (z) + ADP (x) <-> CO2 (a) + SUCC (bcde) + NADH (z) + ATP (x)	α-ketglutarate dehydrogenase and succinyl-CoA synthetase
r56	Vsdh	SUCC (abcd) + FAD (z) <-> FUM (dcba) + FADH2 (z)	Succinate dehydrogenase
r57	Vfum	FUM (abcd) <-> MAL (abcd)	Fumarase
r58	Vmaldh	MAL (abcd) + NAD (z) <-> OAA (abcd) + NADH (z)	Malate dehydrogenase
r59	Vmal1	MAL (abcd) + NAD (z) -> CO2 (d) + PYR.p (abc) + NADH (z)	Malic enzyme 1 (NAD-dependant)
r60	Vmal2	MAL (abcd) + NADP (z) -> PYR.p (bcd) + CO2 (a) + NADPH (z)	Malic enzyme 2 (NADP-dependant)
r61	Vcw	UDPG (abcdefz) -> CWeff (abcdef) + UDP (z)	Total Cell wall synthesis
r62	Vgluprot	GLU (abcde) -> GLU_prot (abcde)	Accumulation of Glutamate in proteins
r63	Vglnprot	GLN (abcde) -> GLN_prot (abcde)	Accumulation of Glutamine in proteins
r64	Vgluk	GLU (abcde) + ATP (z) <-> GLU5P (abcde) + ADP (z)	γ-glutamyl kinase
r65	Vglupr	GLU5P (abcde) + NADH (z) <-> GLUSE (abcde) + NAD (z)	γ-glutamyl phosphate reductase
r66	Vpcr	GLUSE (abcde) + NADPH (z) -> PRO (abcde) + NADP (z)	Pyrroline-5-carboxylate reductase
r67	Vpro	PRO (abcde) -> PRO_prot (abcde)	Accumulation of Proline in proteins
r68	Vcitru	GLU (abcde) + CO2 (A) + ATP (z) + NADPH (y) -> Citru (Aabcde) + ADP (z) + NADP (y)	Glutamate N-acetyltransferase, acetylglutamate kinase, N-acetyl-gamma-glutamyl-phosphate reductase, acetylornithine aminotransferase, aminoacylase and ornithine carbamoyltransferase
r69	Varg	Citru (abcdef) + ATP (z) -> ARG (abcdef) + AMP (z)	Argininosuccinate synthase and argininosuccinate lyase
r70	Vargprot	ARG (abcdef) -> ARG_prot (abcdef)	Accumulation of Arginine in proteins
r71	Vasp	OAA (abcd) <-> ASP (abcd)	Aspartate oxydase
r72	Vaspprot	ASP (abcd) -> ASP_prot (abcd)	Accumulation of Aspartate in proteins
r73	Vaspsa	ASP (abcd) + ATP (z) + NADPH (y) <-> ASPsa (abcd) + NADP (y) + ADP (z)	Aspartate kinase and aspartate semialdehyde dehydrogenase
r74	Vmet	ASPsa (abcd) + CH4 (A) <-> MET (abcdA)	Homoserine dehydrogenase, homoserine O-acetyltransferase and homocysteine S-methyltransferase
r75	Vmetprot	MET (abcde) -> MET_prot (abcde)	Accumulation of methionine in proteins
r76	Vdpa	ASPsa (ABCD) + PYR.p (abc) -> DPA (ABCDabc)	4-hydroxy-tetrahydrodipicolinate synthase
r77	Ctpa	DPA (abcdefg) + NADPH (z) <-> TPA (abcdefg) + NADP (z)	4-hydroxy-tetrahydrodipicolinate reductase
r78	Vdah	TPA (abcdefg) <-> DAH (abcdefg)	LL-diaminopimelate aminotransferase
r79	Vmdah	DAH (abcdefg) <-> mDAH (abcdefg)	Diaminopimelate epimerase
r80	Vlys	mDAH (abcdefg) -> LYS (abcdef) + CO2 (g)	diaminopimelate decarboxylase
r81	Vlysprot	LYS (abcdef) -> LYS_prot (abcdef)	Accumulation of Lysine in proteins
r82	Vser	TP (abc) + NAD (z) <-> SER (abc) + NADH (z)	D-3-phosphoglycerate dehydrogenase, phosphoserine aminotransferase and phosphoserine phosphatase
r83	Vserprot	SER (abc) -> SER_prot (abc)	Accumulation of Serine in proteins
r84	Vgly	SER (abc) <-> GLY (ab) + CH4 (c)	Glycine hydroxymethyltransferase
r85	Vglyprot	GLY (ab) -> GLY_prot (ab)	Accumulation of Glycine in proteins
r86	Vch4eff	CH4 (a) -> CH4eff (a)	Accumulation of CH4
r87	Vasn	ASP (abcd) + ATP (z) <-> ASN (abcd) + AMP (z)	Asparagine synthetase
r88	Vasnprot	ASN (abcd) -> ASN_prot (abcd)	Accumulation of Asparagine in proteins
r89	Vala	PYR.c (abc) -> ALA (abc)	Alanine aminotransferase
r90	Valaprot	ALA (abc) -> ALA_prot (abc)	Accumulation of Alanine in proteins
r91	Vval	PYR.p (ABC) + PYR.p (abc) + 2*NADPH (z) -> VAL (abBCc) + CO2 (A) + 2*NADP (z)	Acetolactate synthase, ketol-acid reductoisomerase, ketol-acid reductoisomerase, dihydroxy-acid dehydratase and valine-pyruvate aminotransferase
r92	Vvalprot	VAL (abcde) -> VAL_prot (abcde)	Accumulation of Valine in proteins
r93	Vval1	PYR.p (ABC) + PYR.p (abc) + 2*NADPH (z) -> LEU1 (abcBC) + CO2 (A) + 2*NADP (z)	Acetolactate synthase, ketol-acid reductoisomerase, ketol-acid reductoisomerase, dihydroxy-acid dehydratase and valine-pyruvate aminotransferase
r94	Vval	LEU1 (ABCDE) + AcCoA.p (ab) + NAD (z) -> LEU (abBDEC) + CO2 (A) + NADH (z)	2-isopropylmalate synthase, 3-isopropylmalate dehydratase, 3-isopropylmalate dehydratase, 3-isopropylmalate dehydrogenase and leucine transaminase
r95	Vleuprot	LEU (abcdef) -> LEU_prot (abcdef)	Accumulation of Leucine in proteins
r96	Vhis	P5Pp (ABCDE) + CH4 (a) + 3*NAD (z) + 6*ATP (y) -> HIS (aEDCBA) + 6*ADP (y) + 3*NADH (z)	ribose 5-phosphate isomerase A, ribose-phosphate pyrophosphokinase, ATP phosphoribosyltransferase, phosphoribosyl-ATP pyrophosphohydrolase, phosphoribosyl-AMP cyclohydrolase, phosphoribosylformimino-5-aminoimidazole carboxamide ribotide isomerase, cyclase, imidazoleglycerol-phosphate dehydratase, histidinol-phosphate aminotransferase, imidazoleglycerol-phosphate dehydratase and histidinol dehydro…
r97	Vhisprot	HIS (abcdef) -> His_prot (abcdef)	Accumulation of Histidine in proteins
r98	Varo	E4Pp (ABCD) + PEP (abc) + NADPH (z) + ATP (y) -> ARO (abcABCD) + ADP (y) + NADP (z)	3-deoxy-7-phosphoheptulonate synthase, 3-dehydroquinate synthase, 3-dehydroquinate dehydratase I, quinate dehydrogenase and shikimate kinase
r99	Vphe	ARO (ABCDEFG) + PEP (abc) + NADPH (z) -> PHE (abcBCDEFG) + CO2 (A) + NADP (z)	3-phosphoshikimate 1-carboxyvinyltransferase, chorismate synthase, prephenate dehydratase and phenylalanine dehydrogenase
r100	Vpheprot	PHE (abcdefghi) -> PHE_prot (abcdefghi)	Accumulation of Phenyalanine in proteins
r101	Vtyr	ARO (ABCDEFG) + PEP (abc) -> TYR (abcBCDEFG) + CO2 (A)	3-phosphoshikimate 1-carboxyvinyltransferase, chorismate synthase, chorismate mutase, prephenate dehydrogenase and L-amino-acid oxidase
r102	Vtyrprot	TYR (abcdefghi) -> TYR_prot (abcdefghi)	Accumulation of Tyrosine in proteins
r103	Vtrp	ARO (ABCDEFG) + P5Pp (abcde) + NADPH (z) + 2*NAD (x) + 4*ATP (y) -> TRP (BCDEFGabcde) + CO2 (A) + NADP (z) + 2*NADH (x) + 4*ADP (y)	3-phosphoshikimate 1-carboxyvinyltransferase, chorismate synthase, anthranilate synthase, anthranilate phosphoribosyltransferase and tryptophan synthase alpha chain
r104	Vtrpprot	TRP (abcdefghijk) -> TRP_prot (abcdefghijk)	Accumulation of Tryptophan in proteins
r105	Vthr	ASP (abcd) + 2*NADPH (z) + 2*ATP (y) -> THR (abcd) + 2*NADP (z) + 2*ADP (y)	aspartate kinase, aspartate-semialdehyde dehydrogenase, homoserine dehydrogenase, homoserine kinase, threonine synthase
r106	Vthrprot	THR (abcd) -> THR_prot (abcd)	Accumulation of Threonine in proteins
r107	Vile	PYR.p (ABC) + THR (abcd) + 2*NADPH (z) -> ILE (abBcdC) + CO2 (A) + 2*NADP (z)	Acetolactate synthase, ketol-acid reductoisomerase, dihydroxy-acid dehydratase, branched-chain amino acid aminotransferase
r108	Vileprot	ILE (abcdef) -> ILE_prot (abcdef)	Accumulation of Isoleucine in proteins
r109	VCO2	CO2 (a) -> CO2eff (a)	Respiration
r110	Vpfkp	F6P.p (abcdef) <-> FBP.p (abcdef)	Plastidial Phopshofructokinase
r111	Vgpip	G6P.p (abcdef) <-> F6P.p (abcdef)	Plastidial Glucose-6-phosphate isomérase
r112	Vprot	0.07*ALA_prot + 0.11*GLY_prot + 0.06*VAL_prot + 0.06*LEU_prot + 0.04*ILE_prot + 0.05*PRO_prot + 0.01*MET_prot + 0.06*SER_prot + 0.04*THR_prot + 0.04*PHE_prot + 0.09*ASP_prot + 0.18*GLU_prot + 0.01*GLN_prot + 0.01*ASN_prot + 0.04*LYS_prot + 0.02*His_prot + 0.02*TYR_prot + 0.01*TRP_prot + 0.08*ARG_prot -> PROT	Protein synthesis
r113	vpseudo_starch_1	0*Starch (abcdef) -> Starch.s (abcdef)	pseudo_flux_starch_1
r114	vpseudo_starch_2	0*Starch.u (abcdef) -> Starch.s (abcdef)	pseudo_flux_starch_2
r115	Vrubisco	P5Pp (ABCDE) + CO2 (a) -> TP (ABC) + TP (aDE)	Ribulose-1,5-bisphosphate carboxylase/oxygénase
r116	vpseudo1_FA16	0*FA16 -> FA16.s	pseudofluxes of FA16
r117	vpseudo2_FA16	0*FA16.u -> FA16.s	pseudofluxes of FA16
r118	vpseudo1_FA18	0*FA18 -> FA18.s	pseudofluxes of FA18
r119	vpseudo2_FA18	0*FA18.u -> FA18.s	pseudofluxes of FA18
r120	vpseudo1_FA18_1	0*FA18_1 -> FA18_1.s	pseudofluxes of FA18_1
r121	vpseudo2_FA18_1	0*FA18_1.u -> FA18_1.s	pseudofluxes of FA18_1
r122	vpseudo1_FA18_2	0*FA18_2 -> FA18_2.s	pseudofluxes of FA18_2
r123	vpseudo2_FA18_2	0*FA18_2.u -> FA18_2.s	pseudofluxes of FA18_2
r124	vpseudo1_FA18_3	0*FA18_3 -> FA18_3.s	pseudofluxes of FA18_3
r125	vpseudo2_FA18_3	0*FA18_3.u -> FA18_3.s	pseudofluxes of FA18_3
r126	Vnrj1	AMP (z) + ATP (y) <-> ADP (z) + ADP (y)	Adenylate kinase
r127	Vnrj2	NADH (z) + 2*ADP (y) <-> NAD (z) + 2*ATP (y)	oxydative phosphorylation / ATP synthase (NADH dependant)
r128	Vnrj3	FADH2 (z) + 1.5*ADP (y) -> FAD (z) + 1.5*ATP (y)	oxydative phosphorylation / ATP synthase (FADH2 dependant)
r129	Vnrj4	ATP (x) + UDP (y) <-> UTP (y) + ADP (x)	uridine diphosphate kinase
r130	Vnrj5	ATP (x) <-> ADP (x)	non-growth associated ATP maintenance
