# Supplementary material for: 13C-Metabolic Flux Analysis in Developing Flaxseed Embryos to Understand Storage Lipid Biosynthesis
Source: Preprints.org preprint supplement (doi:10.20944/preprints201912.0257.v1), 2019-12-19
Supplement: Supplementary file 5 [file Supplementary_Table_S4.xlsx]

## Sheet: Supplementary Table S4
13C-metabolic flux analysis in developing flaxseed embryos to understand storage lipid biosynthesis
Sébastien Acket 1 *, Anthony Degournay 1, Yannick Rossez 1, Stéphane Mottelet 2, Pierre Villon 3, Adrian Troncoso-Ponce 1, and Brigitte Thomasset 1
1 Alliance Sorbonne Université, Génie Enzymatique et Cellulaire, UMR CNRS 7025, Université de Technologie de Compiègne, 60205 Compiègne Cedex, France.
2 Alliance Sorbonne Université, EA 4297 TIMR, Transformations Intégrées de la Matière Renouvelable, Université de Technologie de Compiègne, 60205 Compiègne Cedex, France.
3 Alliance Sorbonne Université, Laboratoire Roberval, FRE UTC CNRS 2012, Université de Technologie de Compiègne, 60205 Compiègne Cedex, France.
* Corresponding author. Email address: sebastien.acket@utc.fr
Supplementary Table S4
Supplementary Table S4: Lists of metabolites and details of their abbreviations used in the metabolic network of flaxseed embryos cell.
	Abbreviation	Name
External fluxes	ext	Source
	eff	Sink
Compartment	.c	cytosolic
	.m	mitochondrial
	.p	plastidial
Pseudofluxes	.s	pseudofluxes sampled pool with cold pool
	.u	pseudofluxes cold pool
Metabolites/ cofactors	ADPG	ADP-Glucose
	AKG	2-oxoglutarate
	ALA	Alanine
	AcACP	Acetyl_acyl carrier protein
	AcCoA	Acetyl-coenzyme A
	ADP	Adenosine diphosphate
	AMP	Adenosine monophosphate
	ARG	Arginine
	ARO	Aromatic amino acid precursor
	ASN	Asparagine
	ASP	Aspartate
	ASPsa	L-Aspartate 4-semialdehyde
	ATP	Adenosine triphosphate
	CH4	Methane
	CIT	Citrate
	Citru	Citruline
	CO2	Carbon dioxyde
	CW	Cell wall
	DAH	L-2-Amino-6-oxoheptanedioate
	DPA	(2S,4S)-4-Hydroxy-2,3,4,5-tetrahydrodipicolinate
	E4P	Erythrose 4-phosphate
	FBP	Fructose-1,6-biphosphate
	F6P	Fructose-6-phosphate
	FA4	Fatty acids with a 4-carbon chain
	FA6	Fatty acids with a 6-carbon chain
	FA8	Fatty acids with a 8-carbon chain
	FA10	Fatty acids with a 10-carbon chain
	FA12	Fatty acids with a 12-carbon chain
	FA14	Fatty acids with a 14-carbon chain
	FA16	Fatty acids with a 16-carbon chain
	FA161	Fatty acids with a 16-carbon chain and 1 double bond
	FA18	Fatty acids with a 18-carbon chain
	FA18_1	Fatty acids with a 18-carbon chain and 1 double bond
	FA18_2	Fatty acids with a 18-carbon chain and 2 double bond
	FA18_3	Fatty acids with a 18-carbon chain and 3 double bond
	FAD	Flavin adenine dinucleotide
	FADH2	Flavin adenine dinucleotide (reduced form)
	Fruc	Fructose
	FUM	Fumarate
	G1P	Glucose-1-phosphate
	G6P	Glucose-6-phosphate
	GLC	Glucose
	GLN	Glutamine
	GLU	Glutamate
	GLU5P	L-Glutamyl 5-phosphate
	GLUSE	L-Glutamate 5-semialdehyde
	GLY	Glycine
	G3P	Glycerol 3-phosphate
	HIS	Histidine
	ICIT	Isocitrate
	ILE	Isoleucine
	LEU	Leucine
	LEU1	intermediate of leucine
	LYS	Lysine
	MAL	Malate
	MalonylACP	Malonyl Acyl carrier protein
	MalonylCoA	Malonyl Coenzyme A
	mDAH	meso-2,6-Diaminoheptanedioate
	MET	Methionine
	NADH	Nicotinamide adenine dinucleotide
	NADPH	Nicotinamide adenine dinucleotide phosphate
	OAA	Oxaloacetate
	P5P	Pentose phosphate
	PEP	Phosphoenolpyruvate
	PHE	Phenylalanine
	PRO	Proline
	PYR	Pyruvate
	S7P	Sedoheptulose-7-phosphate
	SER	Serine
	Starch	Starch
	Starch_d	Starch degradation
	Suc	Sucrose
	SUCC	Succinate
	SucP	Sucrose-phosphate
	TAG	TriAcylGlyceride
	THR	Threonin
	TP	Trioses phosphate
	TPA	2,3,4,5-Tetrahydrodipicolinate
	TRP	Tryptophan
	TYR	Tyrosin
	UDP	Uridine diphosphate
	UDPG	Uridine diphosphate-glucose
	UTP	Uridine triphosphate
	VAL	Valine
