# Supplementary material for: 13C-Metabolic Flux Analysis in Developing Flaxseed Embryos to Understand Storage Lipid Biosynthesis
Source: Preprints.org preprint supplement (doi:10.20944/preprints201912.0257.v1), 2019-12-19
Supplement: Supplementary file 6 [file Supplementary_Table_S5.xlsx]

## Sheet: Supplementary Table S5
13C-metabolic flux analysis in developing flaxseed embryos to understand storage lipid biosynthesis
Sébastien Acket 1 *, Anthony Degournay 1, Yannick Rossez 1, Stéphane Mottelet 2, Pierre Villon 3, Adrian Troncoso-Ponce 1, and Brigitte Thomasset 1
1 Alliance Sorbonne Université, Génie Enzymatique et Cellulaire, UMR CNRS 7025, Université de Technologie de Compiègne, 60205 Compiègne Cedex, France.
2 Alliance Sorbonne Université, EA 4297 TIMR, Transformations Intégrées de la Matière Renouvelable, Université de Technologie de Compiègne, 60205 Compiègne Cedex, France.
3 Alliance Sorbonne Université, Laboratoire Roberval, FRE UTC CNRS 2012, Université de Technologie de Compiègne, 60205 Compiègne Cedex, France.
* Corresponding author. Email address: sebastien.acket@utc.fr
Supplementary Table S5
Supplementary Table S5: Comparison between mass isotopomer distribution measured and simulated
Mass isotopomers: the number of carbon atoms labeled with 13C within a metabolite
Measured: experimentally determined mole fraction of each mass isotopomer
Simulated: mole fraction of each mass isotopomer obtained by simulating the best-fit flux results
Culture B contains 20 mM [U-13C6] glucose, 160 mg/l [U-13C5] glutamine, 80 mM glucose unlabeled and 680 mg/l unlabeled glutamine
Culture C contains 100 mM unlabeled glucose and 800 mg/L [U-13C5] glutamine
Culture D contains 60 mM [U-13C6] glucose, 40 mM [2-13C1] glucose and 800 mg/l unlabeled glutamine
Abbreviations: GLC: Glucose; Fruc: Fructose; Suc: Sucrose; FUM: Fumarate; SUCC: Succinate; MAL: Malate; CIT/ICIT: mixture of citrate and isocitrate; HIS: Histidine; ILE: Isoleucine; THR: Threonine; PRO: Proline; TYR: Tyrosine; PHE:Phenylalanine; VAL: Valine; LEU: Leucine; ALA: Alanine; ARG: Arginine; AcCoA.p from FA16: Mc Lafferty fragment from palmitic acid that containt 2 carbons from acetylCoA…
Isotopic enrichments of free sugars were determined using LC-HRMS as described in ref [34].
Isotopic enrichments of organic acids were determined using LC-HRMS as described in material and method section.
Isotopic enrichment of Mc lafferty fragments were determined using GC-MS as described in material and method section.
Isotopic enrichments of amino acids were determined using CE-HRMS as described in ref [35].
Isotopic enrichments of ALA, ARG, AcCoA.p from C16:0 and Starch were not determined for the culture D.
[34] Acket, S.; Degournay, A.; Merlier, F.; Thomasset, B. 13C labeling analysis of sugars by high resolution-mass spectrometry for Metabolic Flux Analysis. Anal. Biochem 2017, 527, 45-48.
[35] Acket, S.; Degournay, A.; Gosset, M.; Merlier, F.; Troncoso-Ponce, MA.; Thomasset, B. Analysis of 13C labeling amino acids by capillary electrophoresis - High resolution mass spectrometry in developing flaxseed. Anal. Biochem 2018, 547, 14-18.
For each kinetic point, four independent experiments were made.
Fragment	Mass isotopomer	Labeling data (%13C enrichment)
		Culture B		Culture C		Culture D
		Mix [U-13C6] GLC/ [U-13C5] GLN		[U-13C5] GLN		Mix [U-13C6] GLC/ [2-13C1] GLC
		Measured	Simulated	Measured	Simulated	Measured	Simulated
GLC	m0	0.73	0.7152	0.98	0.9771	0	0
	m+1	0.05	0.0587	0.02	0.0641	0.03	0
	m+2	0.04	0.0127	0	0.0018	0.35	0.35
	m+3	0.04	0.0169	0	0	0.01	0.03
	m+4	0.01	0.0031	0	0	0.01	0.01
	m+5	0.01	0.0018	0	0	0.02	0.02
	m+6	0.12	0.1803	0	0	0.58	0.58
Fruc	m0	0.6465	0.6393	0.9495	0.9474	0.05	0.02
	m+1	0.0909	0.065	0.0303	0.0622	0.02	0.01
	m+2	0.0606	0.0235	0.0101	0.0017	0.38	0.35
	m+3	0.0808	0.033	0.0101	0	0	0.06
	m+4	0.0202	0.0061	0	0	0	0.02
	m+5	0.0101	0.0034	0	0	0	0.04
	m+6	0.0909	0.1499	0	0	0.55	0.56
Suc	m0	0.3564	0.3686	0.93	0.922	0.04	0
	m+1	0.1584	0.0887	0.06	0.121	0.01	0
	m+2	0.1089	0.0457	0.01	0.0073	0.02	0.01
	m+3	0.1188	0.0624	0	0.0003	0	0.01
	m+4	0.0495	0.0182	0	0	0.22	0.08
	m+5	0.0297	0.01	0	0	0.01	0.04
	m+6	0.1089	0.1637	0	0	0.03	0.03
	m+7	0.0297	0.0206	0	0	0.04	0.03
	m+8	0.0198	0.0095	0	0	0.04	0.03
	m+9	0.0099	0.013	0	0	0.01	0.07
	m+10	0	0.0024	0	0	0.03	0.03
	m+11	0	0.0013	0	0	0.03	0.04
	m+12	0.0099	0.0174	0	0	0.52	0.24
FUM	m0	0.67	0.6338	0.52	0.5175	0.05	0.22
	m+1	0.15	0.2187	0.15	0.0999	0.24	0.18
	m+2	0.12	0.1471	0.1	0.1314	0.3	0.2
	m+3	0.03	0.067	0.07	0.0747	0.24	0.22
	m+4	0.03	0.0557	0.16	0.1707	0.17	0.18
SUCC	m0	0.73	0.6844	0.38	0.4017	0.08	0.28
	m+1	0.12	0.1881	0.11	0.1187	0.22	0.11
	m+2	0.11	0.1843	0.15	0.197	0.4	0.22
	m+3	0.01	0.036	0.01	0.0123	0.19	0.14
	m+4	0.03	0.0781	0.35	0.2826	0.11	0.11
MAL	m0	0.63	0.612	0.5152	0.5145	0.04	0.21
	m+1	0.1717	0.2112	0.1515	0.0994	0.26	0.18
	m+2	0.1111	0.142	0.101	0.1307	0.31	0.2
	m+3	0.0505	0.0647	0.0707	0.0743	0.25	0.18
	m+4	0.0303	0.0538	0.1616	0.1698	0.14	0.19
CIT/ICIT	m0	0.54	0.472	0.42	0.4061	0.03	0.16
	m+1	0.18	0.2479	0.14	0.0978	0.25	0.2
	m+2	0.14	0.1976	0.09	0.1331	0.27	0.17
	m+3	0.07	0.0966	0.09	0.1259	0.2	0.2
	m+4	0.03	0.0499	0.09	0.0869	0.14	0.14
	m+5	0.03	0.0383	0.15	0.1494	0.07	0.09
	m+6	0.01	0.0118	0.02	0.0106	0.03	0.04
HIS	m0	0.6	0.5257	0.87	0.8748	0.26	0.01
	m+1	0.16	0.2413	0.13	0.0574	0.09	0.02
	m+2	0.11	0.1744	0	0.0016	0.11	0.08
	m+3	0.08	0.1269	0	0	0.15	0.08
	m+4	0.03	0.0393	0	0	0.18	0.1
	m+5	0.02	0.0528	0	0	0.2	0.16
	m+6	0	0.0128	0	0	0.01	0.16
ILE	m0	0.5859	0.4942	0.6275	0.5658	0.22	0.15
	m+1	0.1111	0.2326	0.0196	0.1221	0.09	0.07
	m+2	0.2121	0.2436	0.1275	0.1469	0.25	0.17
	m+3	0.0404	0.1037	0.098	0.0851	0.15	0.15
	m+4	0.0404	0.0749	0.0784	0.1887	0.15	0.16
	m+5	0.0101	0.0168	0.049	0.0043	0.08	0.12
	m+6	0	0.0094	0	0.0003	0.06	0.09
THR	m0	0.63	0.6056	0.59	0.5644	0.34	0.23
	m+1	0.17	0.2089	0.03	0.109	0.11	0.18
	m+2	0.1	0.1405	0.1	0.1433	0.19	0.21
	m+3	0.06	0.064	0.1	0.0815	0.17	0.19
	m+4	0.04	0.0532	0.18	0.1862	0.19	0.2
PRO	m0	0.6364	0.6282	0.29	0.226	0.52	0.52
	m+1	0.1212	0.1343	0.1	0.0538	0.1	0.09
	m+2	0.1212	0.1037	0.03	0.0698	0.17	0.14
	m+3	0.0505	0.0495	0.12	0.1078	0.11	0.12
	m+4	0.0101	0.012	0.02	0.0063	0.06	0.08
	m+5	0.0606	0.1086	0.44	0.4729	0.04	0.07
TYR	m0	0.3762	0.3038	0.8384	0.8422	0.1	0.02
	m+1	0.198	0.2148	0.1212	0.0841	0.03	0.01
	m+2	0.1881	0.2018	0.0202	0.0052	0.01	0.02
	m+3	0.1089	0.1736	0	0.001	0.09	0.04
	m+4	0.0594	0.0971	0.0101	0.0001	0.14	0.1
	m+5	0.0396	0.0521	0.0101	0	0.11	0.11
	m+6	0.0198	0.0249	0	0	0.2	0.19
	m+7	0.0099	0.009	0	0	0.19	0.19
	m+8	0	0.0027	0	0	0.12	0.13
	m+9	0	0.0008	0	0	0	0.12
PHE	m+0	0.14	0.257	0.8081	0.8172	0.12	0.02
	m+1	0.28	0.1818	0.1717	0.0816	0.02	0.01
	m+2	0.2	0.1707	0.0202	0.005	0.03	0.02
	m+3	0.18	0.1469	0	0.0009	0.06	0.06
	m+4	0.1	0.0822	0	0.0001	0.1	0.08
	m+5	0.06	0.044	0	0	0.15	0.15
	m+6	0.03	0.0211	0	0	0.17	0.16
	m+7	0.01	0.0076	0	0	0.15	0.16
	m+8	0	0.0023	0	0	0.13	0.15
	m+9	0	0.0007	0	0	0.07	0.12
VAL	m0	0.66	0.5966	0.82	0.8241	0.17	0.0415
	m+1	0.09	0.1738	0.12	0.0462	0.02	0.05
	m+2	0.13	0.2113	0	0.0024	0.08	0.16
	m+3	0.09	0.1319	0.02	0.0008	0.22	0.19
	m+4	0.01	0.0278	0	0	0.23	0.2
	m+5	0.02	0.0221	0.04	0	0.26	0.26
LEU	m0	0.6078	0.4548	0.6733	0.68	0.21	0.0201
	m+1	0.1373	0.187	0.1386	0.0459	0.09	0.05
	m+2	0.1373	0.3163	0.0891	0.0037	0.24	0.17
	m+3	0.0588	0.081	0.0891	0.0001	0.23	0.19
	m+4	0.0392	0.0674	0.0099	0	0.12	0.16
	m+5	0.0098	0.0085	0	0	0.07	0.11
	m+6	0.0098	0.0044	0	0	0.04	0.1
ALA	m+0	0.69	0.74351	0.87	0.962057	/
	m+1	0.12	0.063964	0.1	0.0322383
	m+2	0.07	0.0415428	0.01	0.00241652
	m+3	0.12	0.150983	0.02	0.0032881
ARG	m+0	0.75	0.493817	0.43	0.265149	/
	m+1	0.14	0.204105	0.1	0.095482
	m+2	0.06	0.123339	0.06	0.0879193
	m+3	0.03	0.0696445	0.08	0.128463
	m+4	0.01	0.0220441	0.03	0.0217084
	m+5	0	0.0701942	0.27	0.358243
	m+6	0	0.016856	0.04	0.0430354
AcCoA.p from FA16	m+0	0.567845	0.57	1	0.958106	/
	m+1	0.225665	0.22	0	0.0252058
	m+2	0.20649	0.22	0	0.016688
Starch	m0	0.7172	0.7179	0.9394	0.9367	/
	m+1	0.0707	0.0607	0.0202	0.0615
	m+2	0.0606	0.0145	0.0303	0.0017
	m+3	0.0606	0.0196	0.0101	0
	m+4	0.0202	0.0036	0	0
	m+5	0	0.002	0	0
	m+6	0.0707	0.0888	0	0
