# Supplementary material for: 13C-Metabolic Flux Analysis in Developing Flaxseed Embryos to Understand Storage Lipid Biosynthesis
Source: Preprints.org preprint supplement (doi:10.20944/preprints201912.0257.v1), 2019-12-19
Supplement: Supplementary file 7 [file Supplementary_Table_S6.xlsx]

## Sheet: Supplementary Table S6
13C-metabolic flux analysis in developing flaxseed embryos to understand storage lipid biosynthesis
Sébastien Acket 1 *, Anthony Degournay 1, Yannick Rossez 1, Stéphane Mottelet 2, Pierre Villon 3, Adrian Troncoso-Ponce 1, and Brigitte Thomasset 1
1 Alliance Sorbonne Université, Génie Enzymatique et Cellulaire, UMR CNRS 7025, Université de Technologie de Compiègne, 60205 Compiègne Cedex, France.
2 Alliance Sorbonne Université, EA 4297 TIMR, Transformations Intégrées de la Matière Renouvelable, Université de Technologie de Compiègne, 60205 Compiègne Cedex, France.
3 Alliance Sorbonne Université, Laboratoire Roberval, FRE UTC CNRS 2012, Université de Technologie de Compiègne, 60205 Compiègne Cedex, France.
* Corresponding author. Email address: sebastien.acket@utc.fr
Supplementary Table S6
Supplementary Table S6: Metabolic fluxes in flaxseed embryos during lipids accumulation
Accurate 95% confidence intervals of fluxes were determined by evaluating the sensitivity of the minimized SSR to flux variations
Fluxes units are in mmol/gDW/d
In the model, extracellular fluxes are composed of glucose (Vg) and glutamine (Va) inputs and reactions of starch (Vsta), cell wall (Vcw), protein (Vprot), and lipids (Vtag) accumulation.
The rates of lipids (Vtag), proteins (Vprot), starch (Vsta), cell wall (Vcw) were quantified according the percentage w/w and the rate of dry weight accumulation
The rates of glucose (Vg), glutamine (Va) uptake were determined as described in Material and methods
Accumulated lipids in the form of triglycerides (TAGs) are composed of different fatty acids. The fatty acid composition of these TAGs has been determined. From the fatty acid profile of the TAGs, coefficients for each fatty acid in the Vtag reaction have been accepted that the lipid synthesis corresponds to the actual fatty acid composition of the TAGs. These coefficients correspond to the fatty…
We did the same thing for protein synthesis. Amino acids composition from proteins can be consulted in Supplementary Table S1.
Abbreviations of reactions and metabolites are respectively detailed in the Supplementary Table S3 and S4.
Reaction ID	Flux or rate description	Reaction	Flux description
			Net	Exchange
R1	Vg	GlCext -> GLC	987,7 ± 15,0	0
R2	Va	GLNext -> GLN	39,5 ± 0,9	0
R3	Vsusy	UDPG + Fruc <-> Suc + UDP	0	0
R4	Vinv	Suc -> GLC + Fruc	0	0
R5	Vhxk2	Fruc + ATP -> F6P.c + ADP	0	0
R6	Vsps	UDPG + F6P.c -> Suc6P + UDP	0	0
R7	Vspp	Suc6P -> Suc	0	0
R8	Vhxk1	GLC + ATP <-> G6P.c + ADP	987,7 ± 0,7	896,3 ± 0,5
R9	Vgpi	G6P.c <-> F6P.c	245,6 ± 1,4	4,6 ± 1,5
R10	Vgpt	G6P.c <-> G6P.p	1188,8 ± 1,3	0
R11	Vpgm	G6P.p <-> G1P	1,0 ± 0,2	0,0 ± 0,5
R12	Vgpa	G1P + ATP -> ADPG + ADP	1,0 ± 0,5	0
R13	Vsts	ADPG + ATP -> Starch + ADP	1,0 ± 0,5	0
R14	Vsta	Starch -> Starch_eff	1,0 ± 0,2	0
R15	Vamy1	Starch -> Starch_d	0,0 ± 0,5	0
R16	Vamy2	Starch_d + ATP -> G1P + AMP	0,0 ± 0,5	0
R17	Vudpg	G6P.c + UTP <-> UDPG	44,4 ± 2,6	2163300 ± 2,6
R18	Vpfkc	FBP.c + ADP <-> F6P.c + ATP	245,6 ± 1,4	0,0 ± 1,5
R19	Vald	TP + TP <-> FBP.c	245,6 ± 1,4	0,0 ± 0,5
R20	Vgapdh	TP + NAD + ADP <-> PEP + NADH + ATP	1407,9 ± 3,9	0 ,0 ± 0,6
R21	Vgpdh	TP + NADH + ATP <-> G3P + NAD + ADP	47,5 ± 0,2	0,0 ± 0,5
R22	Vpkc	PEP + ADP -> PYR.c + ATP	67,8 ± 0,5	0
R23	Vpepc	PEP + CO2 -> OAA	25,7 ± 0,9	0
R24	Vglns	GLU + ATP -> GLN + ADP	0,0 ± 1,1	0
R25	Vglus	GLN + AKG + NADPH -> GLU + GLU + NADP	38,4 ± 0,5	0
R26	Vgludh	GLU + NAD <-> AKG + NADH	44,1 ± 0,9	45,8 ± 1,0
R27	Valdp	FBP.p -> TP + TP	787,3 ± 0,5	0
R28	Vpyrkp	PEP + ADP <-> PYR.p + ATP	1300,7 ± 4,3	1278600,0 ± 4,4
R29	Vpdhp	PYR.p + NAD -> CO2 + AcCoA.p + NADH	1274,1 ± 4,6	0
R30	Vacpmt1	AcCoA.p + CO2 + ATP -> MalonylCoA + ADP	1125,3 ± 4,1	0
R31	Vacpat	AcCoA.p -> AcACP	142,4 ± 0,5	0
R32	Vacpmt2	MalonylCoA -> MalonylACP	1125,3 ± 4,1	0
R33	Vfa4	AcACP + MalonylACP + 2*NADPH -> FA4 + 2*NADP + CO2	142,4 ± 0,5	0
R34	Vfa6	FA4 + MalonylACP + 2*NADPH -> FA6 + 2*NADP + CO2	142,4 ± 0,5	0
R35	Vfa8	FA6 + MalonylACP + 2*NADPH -> FA8 + 2*NADP + CO2	142,4 ± 0,5	0
R36	Vfa10	FA8 + MalonylACP + 2*NADPH -> FA10 + 2*NADP + CO2	142,4 ± 0,5	0
R37	Vfa12	FA10 + MalonylACP + 2*NADPH -> FA12 + 2*NADP + CO2	142,4 ± 0,5	0
R38	Vfa14	FA12 + MalonylACP + 2*NADPH -> FA14 + 2*NADP + CO2	142,4 ± 0,5	0
R39	Vfa16	FA14 + MalonylACP + 2*NADPH -> FA16 + 2*NADP + CO2	142,4 ± 0,5	0
R40	Vfa16d	FA16 + NADH -> FA161 + NAD	0,0 ± 0,5	0
R41	Vfa18	FA16 + MalonylACP + 2*NADPH -> FA18 + 2*NADP + CO2	128,4 ± 0,7	0
R42	Vfa18d	FA18 + NADH -> FA18_1 + NAD	124,0 ± 0,7	0
R43	Vfa18_1	FA161 + MalonylACP + 2*NADPH -> FA18_1 + 2*NADP + CO2	0,0 ± 0,5	0
R44	Vfa16d	FA18_1 + NADH -> FA18_2 + NAD	88,4 ± 0,3	0
R45	Vfa16d	FA18_2 + NADH -> FA18_3 + NAD	68,9 ± 0,3	0
R46	Vtag	G3P + 0.294*FA16 + 0.0945*FA18 + 0.7485*FA18_1 + 0.4113*FA18_2 + 1.45*FA18_3 -> TAG	47,5 ± 0,2	0
R47	Vppp	G6P.p + 2*NADP -> CO2 + P5Pp + 2*NADPH	1187,8 ± 3,7	0
R48	Vtk1	P5Pp + P5Pp <-> S7Pp + TP	397,3 ± 1,2	3453,4 ± 0,5
R49	Tald	TP + S7Pp <-> E4Pp + F6P.p	397,3 ± 1,2	0,0 ± 1,3
R50	Vtk2	P5Pp + E4Pp <-> TP + F6P.p	389,9 ± 1,3	841,6 ± 1,4
R51	Vpdhm	PYR.c + NAD -> CO2 + AcCoA.c + NADH	60,4 ± 0,5	0
R52	Vcs	AcCoA.c + OAA <-> CIT	60,4 ± 0,5	32,1 ± 0,8
R53	Vaco	CIT <-> ICIT	60,4 ± 0,5	233,8 ± 0,5
R54	Vidh	ICIT + NAD <-> CO2 + AKG + NADH	60,4 ± 0,5	239,9 ± 0,5
R55	Vkdh	AKG + NAD + ADP <-> CO2 + SUCC + NADH + ATP	66,1 ± 1,0	0,0 ± 0,5
R56	Vsdh	SUCC + FAD <-> FUM + FADH2	66,1 ± 1,0	0,0 ± 1,1
R57	Vfum	FUM <-> MAL	66,1 ± 1,0	5982500,0 ± 1,1
R58	Vmaldh	MAL + NAD <-> OAA + NADH	59,0 ± 1,1	9999900,0 ± 0,5
R59	Vmal1	MAL + NAD -> CO2 + PYR.p + NADH	7,1 ± 0,5	0
R60	Vmal2	MAL + NADP -> PYR.p + CO2 + NADPH	0,0 ± 0,5	0
R61	Vcw	UDPG -> CWeff + UDP	44,4 ± 16,4	0
R62	Vgluprot	GLU -> GLU_prot	19,0 ± 0,3	0
R63	Vglnprot	GLN -> GLN_prot	1,1 ± 0,0	0
R64	Vgluk	GLU + ATP <-> GLU5P + ADP	5,3 ± 0,1	0
R65	Vglupr	GLU5P + NADH <-> GLUSE + NAD	5,3 ± 0,1	0
R66	Vpcr	GLUSE + NADPH -> PRO + NADP	5,3 ± 0,1	0
R67	Vpro	PRO -> PRO_prot	5,3 ± 0,1	0
R68	Vcitru	GLU + CO2 + ATP + NADPH -> Citru + ADP + NADP	8,4 ± 0,1	0
R69	Varg	Citru + ATP -> ARG + AMP	8,4 ± 0,1	0
R70	Vargprot	ARG -> ARG_prot	8,4 ± 0,1	0
R71	Vasp	OAA <-> ASP	27,3 ± 0,4	0,0 ± 0,5
R72	Vaspprot	ASP -> ASP_prot	9,5 ± 0,1	0
R73	Vaspsa	ASP + ATP + NADPH <-> ASPsa + NADP + ADP	5,3 ± 0,1	0,0 ± 0,5
R74	Vmet	ASPsa + CH4 <-> MET	1,1 ± 0,0	0,0 ± 0,5
R75	Vmetprot	MET -> MET_prot	1,1 ± 0,0	0
R76	Vdpa	ASPsa + PYR.p -> DPA	4,2 ± 0,1	0
R77	Ctpa	DPA + NADPH <-> TPA + NADP	4,2 ± 0,1	0,0 ± 0,5
R78	Vdah	TPA <-> DAH	4,2 ± 0,1	0,0 ± 0,5
R79	Vmdah	DAH <-> mDAH	4,2 ± 0,1	0,0 ± 0,5
R80	Vlys	mDAH -> LYS + CO2	4,2 ± 0,1	0,0 ± 0,5
R81	Vlysprot	LYS -> LYS_prot	4,2 ± 0,1	0
R82	Vser	TP + NAD <-> SER + NADH	17,9 ± 0,3	0,0 ± 0,5
R83	Vserprot	SER -> SER_prot	6,3 ± 0,1	0
R84	Vgly	SER <-> GLY + CH4	11,6 ± 0,2	14,5 ± 0,5
R85	Vglyprot	GLY -> GLY_prot	11,6 ± 0,2	0
R86	Vch4eff	CH4 -> CH4eff	8,4 ± 0,1	0
R87	Vasn	ASP + ATP <-> ASN + AMP	1,1 ± 0,0	0,0 ± 0,5
R88	Vasnprot	ASN -> ASN_prot	1,1 ± 0,0	0
R89	Vala	PYR.c -> ALA	7,4 ± 0,1	0
R90	Valaprot	ALA -> ALA_prot	7,4 ± 0,1	0
R91	Vval	PYR.p + PYR.p + 2*NADPH -> VAL + CO2 + 2*NADP	6,3 ± 0,1	0
R92	Vvalprot	VAL -> VAL_prot	6,3 ± 0,1	0
R93	Vval1	PYR.p + PYR.p + 2*NADPH -> LEU1 + CO2 + 2*NADP	6,3 ± 0,1	0
R94	Vval	LEU1 + AcCoA.p + NAD -> LEU + CO2 + NADH	6,3 ± 0,1	0
R95	Vleuprot	LEU -> LEU_prot	6,3 ± 0,1	0
R96	Vhis	P5Pp + CH4 + 3*NAD + 6*ATP -> HIS + 6*ADP + 3*NADH	2,1 ± 0,0	0
R97	Vhisprot	HIS -> His_prot	2,1 ± 0,0	0
R98	Varo	E4Pp + PEP + NADPH + ATP -> ARO + ADP + NADP	7,4 ± 0,1	0
R99	Vphe	ARO + PEP + NADPH -> PHE + CO2 + NADP	4,2 ± 0,1	0
R100	Vpheprot	PHE -> PHE_prot	4,2 ± 0,1	0
R101	Vtyr	ARO + PEP -> TYR + CO2	2,1 ± 0,0	0
R102	Vtyrprot	TYR -> TYR_prot	2,1 ± 0,0	0
R103	Vtrp	ARO + P5Pp + NADPH + 2*NAD + 4*ATP -> TRP + CO2 + NADP + 2*NADH + 4*ADP	1,1 ± 0,0	0
R104	Vtrpprot	TRP -> TRP_prot	1,1 ± 0,0	0
R105	Vthr	ASP + 2*NADPH + 2*ATP -> THR + 2*NADP + 2*ADP	8,4 ± 0,1	0
R106	Vthrprot	THR -> THR_prot	4,2 ± 0,1	0
R107	Vile	PYR.p + THR + 2*NADPH -> ILE + CO2 + 2*NADP	4,2 ± 0,1	0
R108	Vileprot	ILE -> ILE_prot	4,2 ± 0,1	0
R109	VCO2	CO2 -> CO2eff	2656,5 ± 8,6	0
R110	Vpfkp	F6P.p <-> FBP.p	787,3 ± 0,5	0,0 ± 0,5
R111	Vgpip	G6P.p <-> F6P.p	0,0 ± 2,6	0,0 ± 0,5
R112	Vprot	0.07*ALA_prot + 0.11*GLY_prot + 0.06*VAL_prot + 0.06*LEU_prot + 0.04*ILE_prot + 0.05*PRO_prot + 0.01*MET_prot + 0.06*SER_prot + 0.04*THR_prot + 0.04*PHE_prot + 0.09*ASP_prot + 0.18*GLU_prot + 0.01*GLN_prot + 0.01*ASN_prot + 0.04*LYS_prot + 0.02*His_prot + 0.02*TYR_prot + 0.01*TRP_prot + 0.08*ARG_prot -> PROT	105,6 ± 1,6	0
R113	vpseudo_starch_1	0*Starch -> Starch.s	0,0 ± 0,8	0
R114	vpseudo_starch_2	0*Starch.u -> Starch.s	0,0 ± 0,5	0
R115	Vrubisco	P5Pp + CO2 -> TP + TP	0,0 ± 0,5	0
R116	vpseudo1_FA16	0*FA16 -> FA16.s	0,0 ± 1,3	0
R117	vpseudo2_FA16	0*FA16.u -> FA16.s	0,0 ± 0,5	0
R118	vpseudo1_FA18	0*FA18 -> FA18.s	0,0 ± 0,5	0
R119	vpseudo2_FA18	0*FA18.u -> FA18.s	0,0 ± 0,5	0
R120	vpseudo1_FA18_1	0*FA18_1 -> FA18_1.s	0,0 ± 1,4	0
R121	vpseudo2_FA18_1	0*FA18_1.u -> FA18_1.s	0,0 ± 0,5	0
R122	vpseudo1_FA18_2	0*FA18_2 -> FA18_2.s	0,0 ± 0,9	0
R123	vpseudo2_FA18_2	0*FA18_2.u -> FA18_2.s	0,0 ± 0,5	0
R124	vpseudo1_FA18_3	0*FA18_3 -> FA18_3.s	0,0 ± 0,7	0
R125	vpseudo2_FA18_3	0*FA18_3.u -> FA18_3.s	0,0 ± 0,5	0
R126	Vnrj1	AMP + ATP <-> ADP + ADP	9,5 ± 0,5	0,0 ± 0,5
R127	Vnrj2	NADH + 2*ADP <-> NAD + 2*ATP	1403,7 ± 4,1	0,0 ± 0,5
R128	Vnrj3	FADH2 + 1.5*ADP -> FAD + 1.5*ATP	66,1 ± 1,0	0
R129	Vnrj4	ATP + UDP <-> UTP + ADP	44,4 ± 2,6	0,0 ± 0,5
R130	Vnrj5	ATP <-> ADP	0,0 ± 0,7	0,0 ± 0,5
